# Supplementary material
Source: PubMed Central journal article supplement (PMC2981788)

Sup. Figure 1A

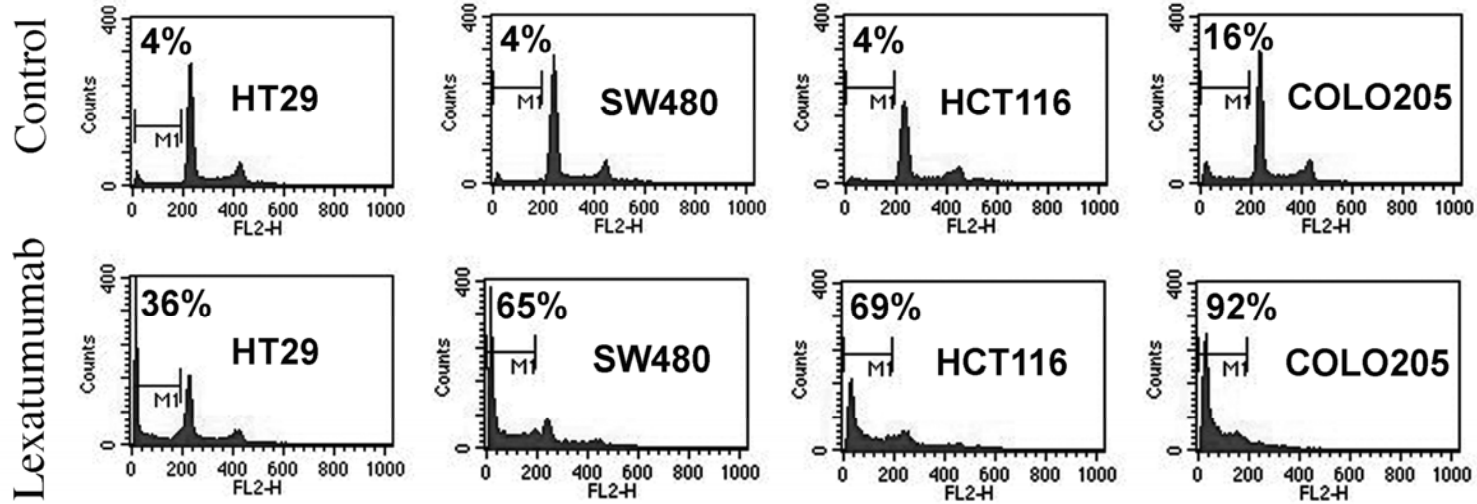

Sup. Figure 1B

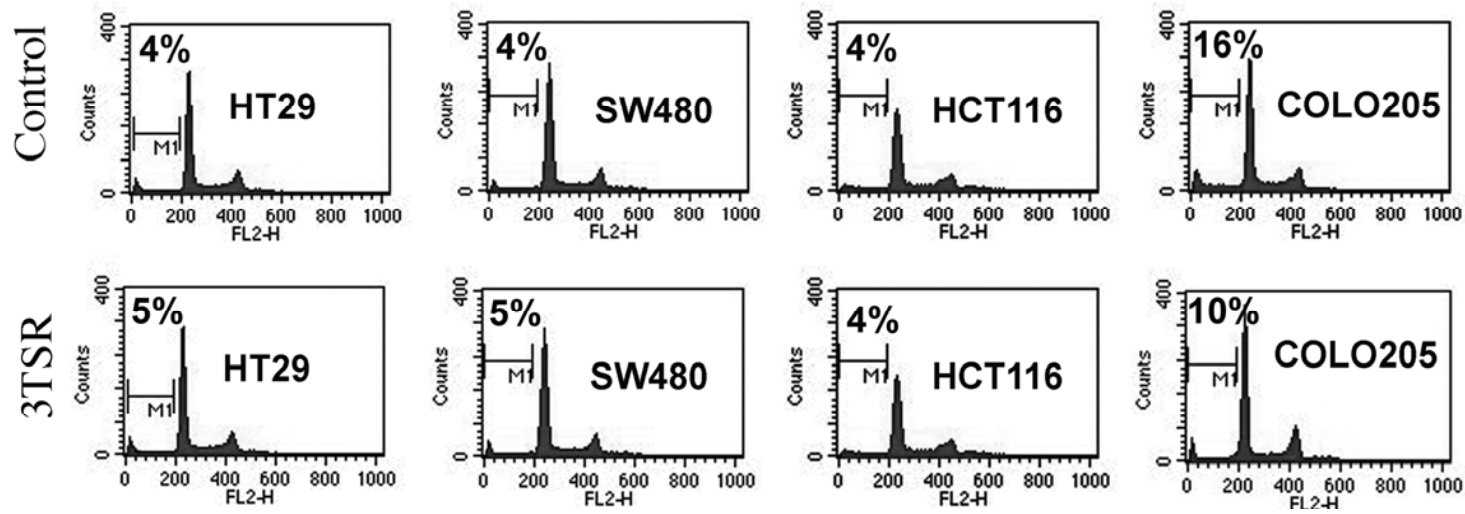

Sup. Figure 1C

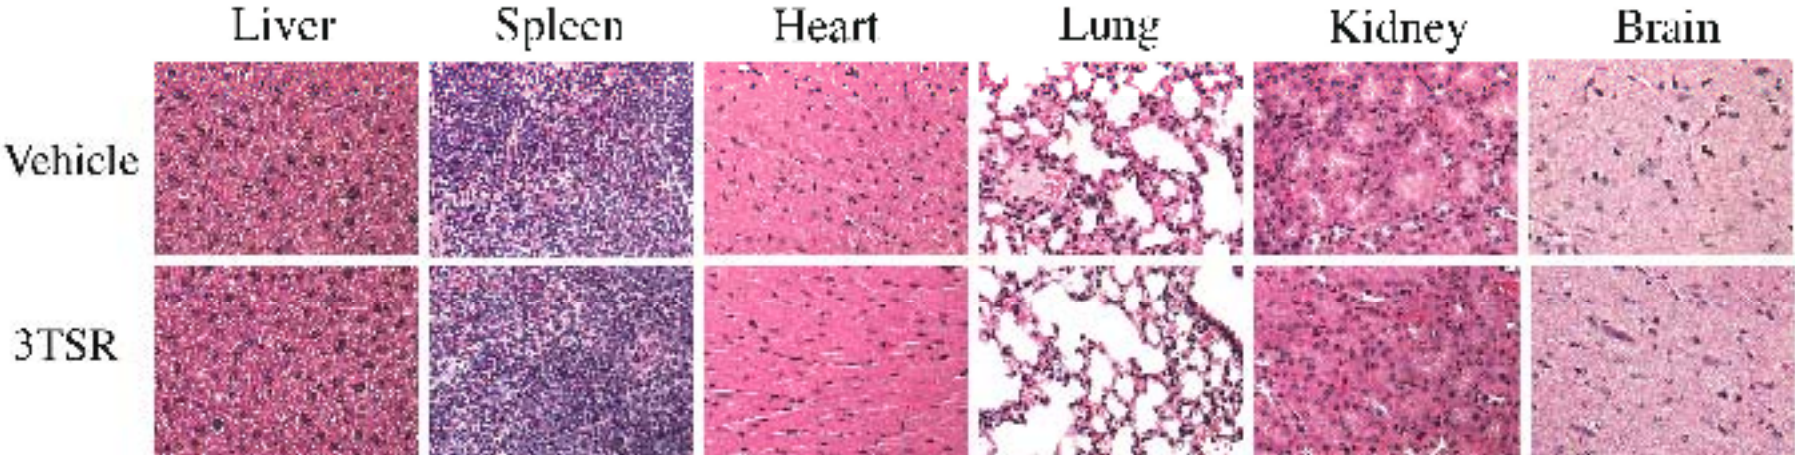

# Supplementary Fig. 2

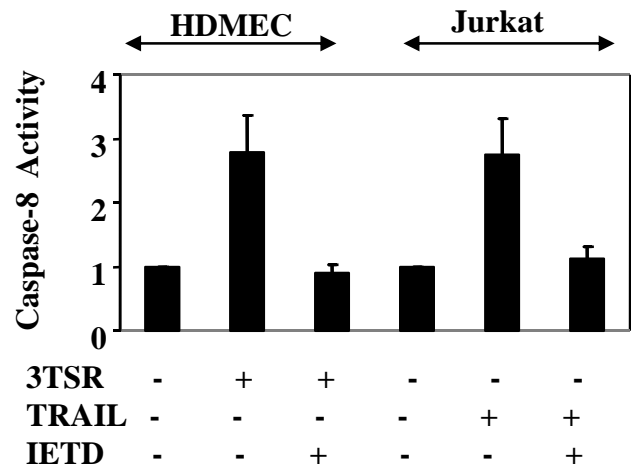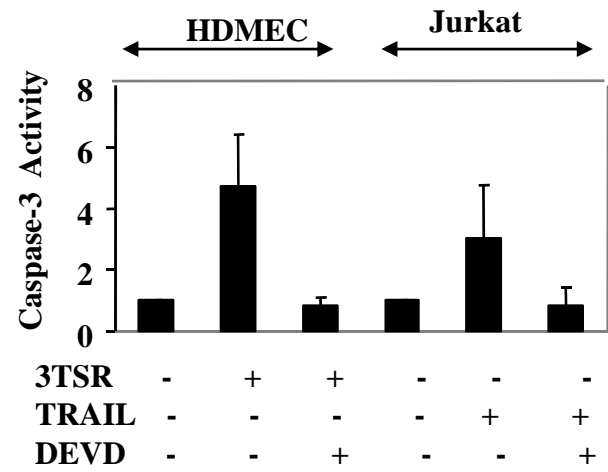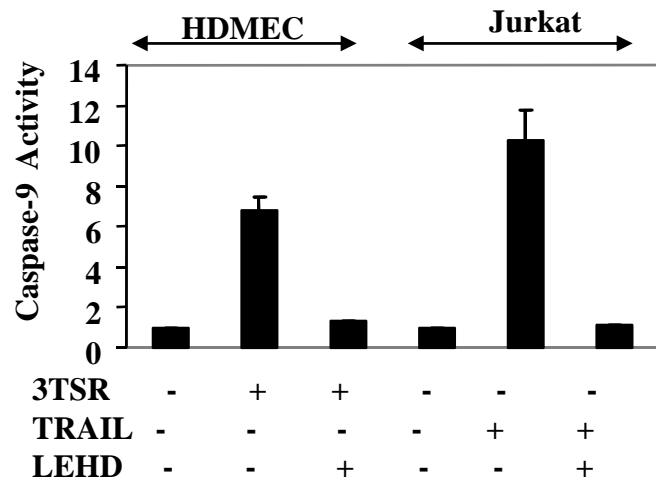

Sup. Figure 3

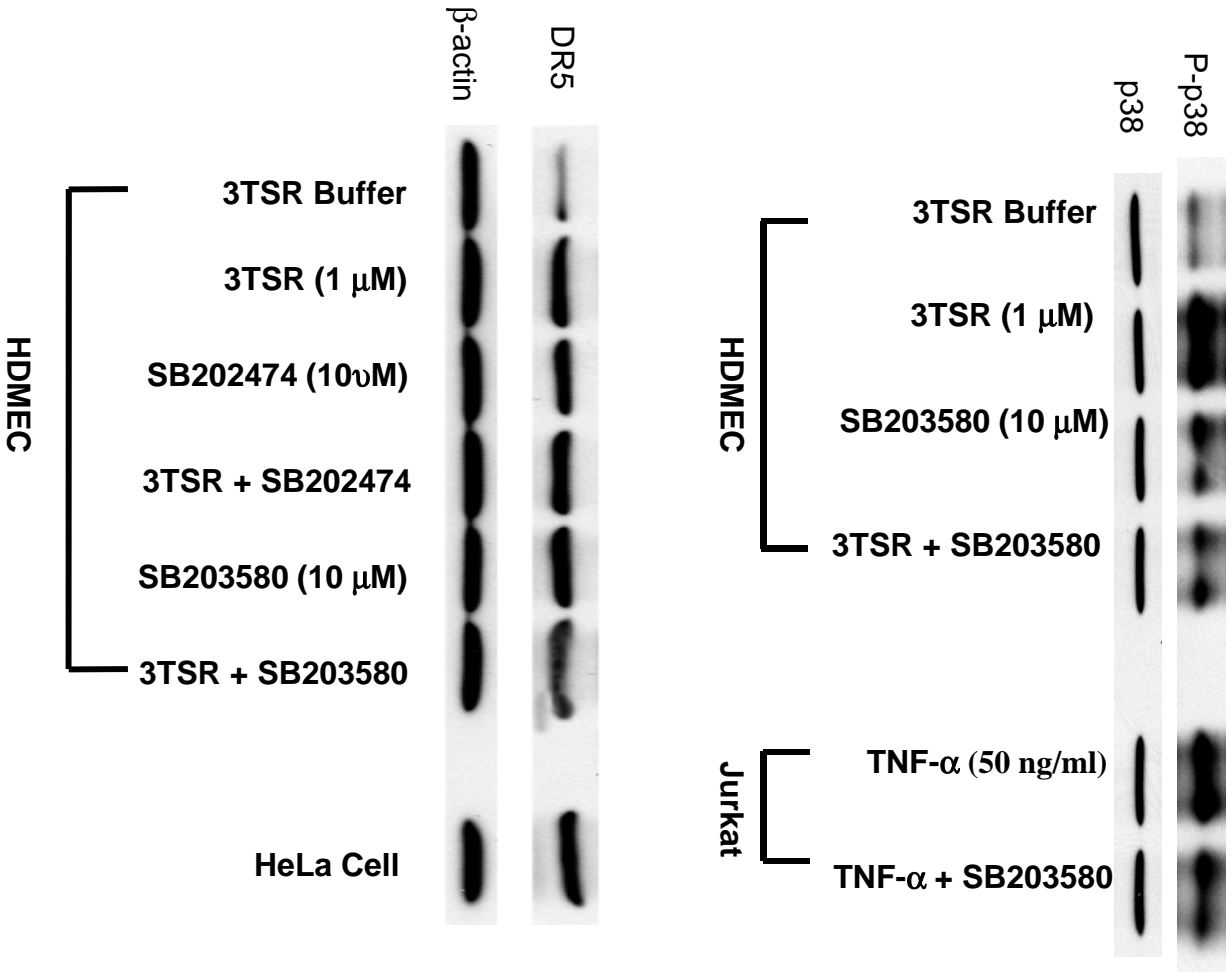

Supplement: NIHMS224921-supplement-Figures.pdf [file NIHMS224921-supplement-Figures.pdf]
